# Supplementary material for: Time-dependent effect of intense capsule-coffee and bleaching on the color of resin-infiltrated enamel white spot lesions: an in vitro study
Source: PeerJ. 2022 Oct 6;10:e14135. doi: 10.7717/peerj.14135 (PMC9548318; doi:10.7717/peerj.14135)
Supplement: Supplemental Information 1 [file peerj-10-14135-s001.xlsx]

## Sheet: Sheet1
			Statistical Analysis of L
				Analysis of L
				General Linear Model
				Repeated measure mixed Design ANOVA
				One within subjects factor : Time
				One between subjects factors : Surfaces ( test & control)
				Descriptive Statistics
				group		Mean	SD	N
				L After ICON	Test surface	7.16	3.6213	10
					Control surface	6.68	2.58147	10
				L After 1st staining	Test surface	0.46	2.58895	10
					Control surface	2.46	3.00118	10
				L After 2nd staining	Test surface	0.54	4.60632	10
					Control surface	1.84	3.13163	10
				L After 3rd staining	Test surface	-0.81	2.93161	10
					Control surface	1.29	6.04124	10
				L After 4th staining	Test surface	-0.87	2.51487	10
					Control surface	0.49	4.01205	10
					Test surface	Control surface
				Lv baseline*	7.16	6.68
				Lv staining (2 days)*	0.46	2.46
				Lv staining (4 days)*	0.54	1.84
				Lv staining (6 days)*	-0.81	1.29
				Lv staining (8 days)*	-0.87	0.49
				Mauchly's Test of Sphericity is non significant indicating no violation of sphericity assumption
				Tests of Within-Subjects Effects
						Sum of Squares	df	Mean Square	F	P Value
				time	Sphericity Assumed	660.378	4	165.095	27.7449	5.97116e-14	P < 0.001 HS
				time * group	Sphericity Assumed	21.4616	4	5.3654	0.901681	0.467669	P > 0.05 NS
				Error	Sphericity Assumed	428.432	72	5.95044
				Time as a main effect is statistically highly significant
				Interaction of time and groups (Surfaces) is statistically non significant.
				Tests of Between-Subjects Effects
					Sum of Squares	df	Mean Square	F	P Value
				Intercept	370.178	1	370.178	8.56681	0.0090059	P < 0.001 HS
				group	39.4384	1	39.4384	0.912701	0.352054	P > 0.05 NS
				Error	777.792	18	43.2107
				Type of surface (groups) as a main effect is statistically non significant
				Estimated Marginal Means
				1. time
				Estimates
				Measure: E
				time	Mean	Std. Error	95% Confidence Interval
							Lower Bound	Upper Bound
				L After ICON	6.92	0.703167	5.4427	8.3973
				L After 1st staining	1.46	0.626693	0.143366	2.77663
				L After 2nd staining	1.19	0.8807	-0.660283	3.04028
				L After 3rd staining	0.24	1.06173	-1.99061	2.47061
				L After 4th staining	-0.19	0.748684	-1.76293	1.38293
				Multiple Comparison by Bonferroni method
				(I) time	(J) time	Mean Difference (I-J)	Std. Error	P Value	95% Confidence Interval for Difference
									Lower Bound	Upper Bound
				L After ICON	L After 1st staining	5.46	0.740113	7.61909e-06	3.09418	7.82582	P < 0.001 HS
				L After ICON	L After 2nd staining	5.73	0.691496	1.47977e-06	3.51958	7.94042	P < 0.001 HS
				L After ICON	L After 3rd staining	6.68	1.09609	9.2945e-05	3.17626	10.1837	P < 0.001 HS
				L After ICON	L After 4th staining	7.11	0.734185	1.46002e-07	4.76312	9.45688	P < 0.001 HS
				L After 1st staining	L After 2nd staining	0.27	0.550535	1	-1.48983	2.02983	P > 0.05 NS
				L After 1st staining	L After 3rd staining	1.22	0.890602	1	-1.62688	4.06688	P > 0.05 NS
				L After 1st staining	L After 4th staining	1.65	0.476917	0.0279581	0.125499	3.1745	P < 0.05 S
				L After 2nd staining	L After 3rd staining	0.95	0.916773	1	-1.98053	3.88053	P > 0.05 NS
				L After 2nd staining	L After 4th staining	1.38	0.53633	0.191532	-0.334419	3.09442	P > 0.05 NS
				L After 3rd staining	L After 4th staining	0.43	0.855706	1	-2.30533	3.16533	P > 0.05 NS
				2. group
				Estimates
				Measure: E
				group	Mean	Std. Error	95% Confidence Interval
							Lower Bound	Upper Bound
				Test surface	1.296	0.929631	-0.657082	3.24908
				Control surface	2.552	0.929631	0.598918	4.50508
				Pairwise Comparison by Bonferroni method
						Mean Difference	Std. Error	P Value	95% Confidence Interval for Difference
									Lower Bound	Upper Bound
				Test surface	Control surface	-1.256	1.3147	0.352054	-4.01807	1.50607	P > 0.05 NS
				Independent samples t test for comparing the change
				in L relative to initial time between the two groups
												95% Confidence Interval of the Difference
						N	Mean	SD	SEM	Mean Difference	SED	Lower	Upper	t	df	P Value
				Difference L (1st staining-after ICON)	Test surface	10	-6.7	3.5462	1.12141	-2.48	1.48023	-5.58984	0.629838	-1.67542	18	0.111136	P > 0.05 NS
					Control surface	10	-4.22	3.05534	0.966184
				Difference L (2nd staining-after ICON)	Test surface	10	-6.62	3.5705	1.12909	-1.78	1.38299	-4.68556	1.12556	-1.28706	18	0.214377	P > 0.05 NS
					Control surface	10	-4.84	2.52551	0.798638
				Difference L (3rd staining-after ICON)	Test surface	10	-7.97	3.04997	0.964486	-2.58	2.19218	-7.18561	2.02561	-1.17691	18	0.254561	P > 0.05 NS
					Control surface	10	-5.39	5.2253	1.96861
				Difference L (4th staining-after ICON)	Test surface	10	-8.03	2.44	0.77	0.64	0.953834	-1.36393	2.64393	0.670976	18	0.510755	P > 0.05 NS
					Control surface	10	-1.97	3.95	1.25
				Difference of the change of L relative to initial time between the two surfaces is statistically nonsignificant
				at all the time points
					Test surface	Control surface
				ΔLv2*	-6.7	-4.22
				ΔLv4*	-6.62	-4.84
				ΔLv6*	-7.97	-5.39
				ΔLv8*	-8.03	-6.19

## Sheet: Sheet3
		SPSS output
		General Linear Model
		Repeated measure mixed Design ANOVA
		One within subjects factor : Time
		One between subjects factors : Surfaces ( test & control)
		Within-Subjects Factors
		Measure: L
		time	Dependent Variable
		1	LIC
		2	Ls1
		3	Ls2
		4	Ls3
		5	Ls4
		Between-Subjects Factors
				Value Label	N
		group	1.00	Test surface	10
			2.00	Control surface	10
		Descriptive Statistics
		group		Mean	Std. Deviation	N
		L After ICON	Test surface	7.16	3.6213	10
			Control surface	6.68	2.58147	10
			Total	6.92	3.07068	20
		L After 1st staining	Test surface	0.46	2.58895	10
			Control surface	2.46	3.00118	10
			Total	1.46	2.91446	20
		L After 2nd staining	Test surface	0.54	4.60632	10
			Control surface	1.84	3.13163	10
			Total	1.19	3.89114	20
		L After 3rd staining	Test surface	-0.81	2.93161	10
			Control surface	1.29	6.04124	10
			Total	0.24	4.74546	20
		L After 4th staining	Test surface	-0.87	2.51487	10
			Control surface	0.49	4.01205	10
			Total	-0.19	3.33276	20
		Box's Test of Equality of Covariance Matricesa
		Box's M	38.7077
		F	1.78625
		df1	15
		df2	1304.53
		Sig.	0.0316851
		Tests the null hypothesis that the observed covariance matrices of the dependent variables are equal across groups.
		a. Design: Intercept + group Within Subjects Design: time
		Multivariate Testsa
		Effect		Value	F	Hypothesis df	Error df	Sig.
		time	Pillai's Trace	0.845834	20.574b	4	15	5.96804e-06
			Wilks' Lambda	0.154166	20.574b	4	15	5.96804e-06
			Hotelling's Trace	5.48652	20.574b	4	15	5.96804e-06
			Roy's Largest Root	5.48652	20.574b	4	15	5.96804e-06
		time * group	Pillai's Trace	0.140059	.611b	4	15	0.661244
			Wilks' Lambda	0.859941	.611b	4	15	0.661244
			Hotelling's Trace	0.162871	.611b	4	15	0.661244
			Roy's Largest Root	0.162871	.611b	4	15	0.661244
		a. Design: Intercept + group Within Subjects Design: time
		b. Exact statistic
		Mauchly's Test of Sphericitya
		Measure: L
		Within Subjects Effect	Mauchly's W	Approx. Chi-Square	df	Sig.	Epsilonb
							Greenhouse-Geisser	Huynh-Feldt	Lower-bound
		time	0.402507	14.9399	9	0.0941088	0.674593	0.84905	0.25
		Tests the null hypothesis that the error covariance matrix of the orthonormalized transformed dependent variables is proportional to an identity matrix.
		a. Design: Intercept + group Within Subjects Design: time
		b. May be used to adjust the degrees of freedom for the averaged tests of significance. Corrected tests are displayed in the Tests of Within-Subjects Effects table.
		Tests of Within-Subjects Effects
		Measure: L
		Source		Type III Sum of Squares	df	Mean Square	F	Sig.
		time	Sphericity Assumed	660.378	4	165.095	27.7449	5.97116e-14
			Greenhouse-Geisser	660.378	2.69837	244.732	27.7449	4.25235e-10
			Huynh-Feldt	660.378	3.3962	194.446	27.7449	3.63233e-12
			Lower-bound	660.378	1	660.378	27.7449	5.22442e-05
		time * group	Sphericity Assumed	21.4616	4	5.3654	0.901681	0.467669
			Greenhouse-Geisser	21.4616	2.69837	7.95354	0.901681	0.438403
			Huynh-Feldt	21.4616	3.3962	6.3193	0.901681	0.455695
			Lower-bound	21.4616	1	21.4616	0.901681	0.354908
		Error(time)	Sphericity Assumed	428.432	72	5.95044
			Greenhouse-Geisser	428.432	48.5707	8.8208
			Huynh-Feldt	428.432	61.1316	7.00835
			Lower-bound	428.432	18	23.8018
		Tests of Within-Subjects Contrasts
		Measure: L
		Source		Type III Sum of Squares	df	Mean Square	F	Sig.
		time	Linear	476.787	1	476.787	73.4193	9.09529e-08
			Quadratic	125.692	1	125.692	27.1172	5.93916e-05
			Cubic	43.6178	1	43.6178	6.38811	0.0210679
			Order 4	14.2814	1	14.2814	2.4435	0.135423
		time * group	Linear	7.1442	1	7.1442	1.10012	0.30812
			Quadratic	8.71557	1	8.71557	1.88033	0.187151
			Cubic	1.3448	1	1.3448	0.196955	0.662479
			Order 4	4.25703	1	4.25703	0.728364	0.404628
		Error(time)	Linear	116.893	18	6.49403
			Quadratic	83.4324	18	4.63513
			Cubic	122.903	18	6.82797
			Order 4	105.204	18	5.84464
		Levene's Test of Equality of Error Variancesa
			F	df1	df2	Sig.
		L After ICON	1.18273	1	18	0.291149
		L After 1st staining	0.0224506	1	18	0.882561
		L After 2nd staining	1.14063	1	18	0.299634
		L After 3rd staining	1.31115	1	18	0.267184
		L After 4th staining	0.321873	1	18	0.577492
		Tests the null hypothesis that the error variance of the dependent variable is equal across groups.
		a. Design: Intercept + group Within Subjects Design: time
		Tests of Between-Subjects Effects
		Measure: L Transformed Variable: Average
		Source	Type III Sum of Squares	df	Mean Square	F	Sig.
		Intercept	370.178	1	370.178	8.56681	0.0090059
		group	39.4384	1	39.4384	0.912701	0.352054
		Error	777.792	18	43.2107
		Estimated Marginal Means
		1. group
		Estimates
		Measure: L
		group	Mean	Std. Error	95% Confidence Interval
					Lower Bound	Upper Bound
		Test surface	1.296	0.929631	-0.657082	3.24908
		Control surface	2.552	0.929631	0.598918	4.50508
		Pairwise Comparisons
		Measure: L
		(I) group		Mean Difference (I-J)	Std. Error	Sig.a	95% Confidence Interval for Differencea
							Lower Bound	Upper Bound
		Test surface	Control surface	-1.256	1.3147	0.352054	-4.01807	1.50607
		Control surface	Test surface	1.256	1.3147	0.352054	-1.50607	4.01807
		Based on estimated marginal means
		a. Adjustment for multiple comparisons: Bonferroni.
		Univariate Tests
		Measure: L
			Sum of Squares	df	Mean Square	F	Sig.
		Contrast	7.88768	1	7.88768	0.912701	0.352054
		Error	155.558	18	8.64213
		The F tests the effect of group. This test is based on the linearly independent pairwise comparisons among the estimated marginal means.
		2. time
		Estimates
		Measure: L
		time	Mean	Std. Error	95% Confidence Interval
					Lower Bound	Upper Bound
		1	6.92	0.703167	5.4427	8.3973
		2	1.46	0.626693	0.143366	2.77663
		3	1.19	0.8807	-0.660283	3.04028
		4	0.24	1.06173	-1.99061	2.47061
		5	-0.19	0.748684	-1.76293	1.38293
		Pairwise Comparisons
		Measure: L
		(I) time		Mean Difference (I-J)	Std. Error	Sig.b	95% Confidence Interval for Differenceb
							Lower Bound	Upper Bound
		1	2	5.460*	0.740113	7.61909e-06	3.09418	7.82582
			3	5.730*	0.691496	1.47977e-06	3.51958	7.94042
			4	6.680*	1.09609	9.2945e-05	3.17626	10.1837
			5	7.110*	0.734185	1.46002e-07	4.76312	9.45688
		2	1	-5.460*	0.740113	7.61909e-06	-7.82582	-3.09418
			3	0.27	0.550535	1	-1.48983	2.02983
			4	1.22	0.890602	1	-1.62688	4.06688
			5	1.650*	0.476917	0.0279581	0.125499	3.1745
		3	1	-5.730*	0.691496	1.47977e-06	-7.94042	-3.51958
			2	-0.27	0.550535	1	-2.02983	1.48983
			4	0.95	0.916773	1	-1.98053	3.88053
			5	1.38	0.53633	0.191532	-0.334419	3.09442
		4	1	-6.680*	1.09609	9.2945e-05	-10.1837	-3.17626
			2	-1.22	0.890602	1	-4.06688	1.62688
			3	-0.95	0.916773	1	-3.88053	1.98053
			5	0.43	0.855706	1	-2.30533	3.16533
		5	1	-7.110*	0.734185	1.46002e-07	-9.45688	-4.76312
			2	-1.650*	0.476917	0.0279581	-3.1745	-0.125499
			3	-1.38	0.53633	0.191532	-3.09442	0.334419
			4	-0.43	0.855706	1	-3.16533	2.30533
		Based on estimated marginal means
		*. The mean difference is significant at the .05 level.
		b. Adjustment for multiple comparisons: Bonferroni.
		Multivariate Tests
			Value	F	Hypothesis df	Error df	Sig.
		Pillai's trace	0.845834	20.574a	4	15	5.96804e-06
		Wilks' lambda	0.154166	20.574a	4	15	5.96804e-06
		Hotelling's trace	5.48652	20.574a	4	15	5.96804e-06
		Roy's largest root	5.48652	20.574a	4	15	5.96804e-06
		Each F tests the multivariate effect of time. These tests are based on the linearly independent pairwise comparisons among the estimated marginal means.
		a. Exact statistic
		3. group * time
		Measure: L
		group		Mean	Std. Error	95% Confidence Interval
						Lower Bound	Upper Bound
		Test surface	1	7.16	0.994429	5.07078	9.24922
			2	0.46	0.886278	-1.402	2.322
			3	0.54	1.2455	-2.0767	3.1567
			4	-0.81	1.50151	-3.96456	2.34456
			5	-0.87	1.0588	-3.09445	1.35445
		Control surface	1	6.68	0.994429	4.59078	8.76922
			2	2.46	0.886278	0.597999	4.322
			3	1.84	1.2455	-0.776695	4.4567
			4	1.29	1.50151	-1.86456	4.44456
			5	0.49	1.0588	-1.73445	2.71445
		Profile Plots
