# Supplementary material for: Time-dependent effect of intense capsule-coffee and bleaching on the color of resin-infiltrated enamel white spot lesions: an in vitro study
Source: PeerJ. 2022 Oct 6;10:e14135. doi: 10.7717/peerj.14135 (PMC9548318; doi:10.7717/peerj.14135)
Supplement: Supplemental Information 2 [file peerj-10-14135-s002.xlsx]

## Sheet: Sheet1
				Statistical Analysis of L
					Test Surface			Control surface
					Shapiro-Wilk			Shapiro-Wilk
					Statistic	df	Sig.	Statistic	df	Sig.
				E After ICON	0.88162	10	0.136196	0.880892	10	0.133604
				E After 1st staining	0.926582	10	0.415124	0.830802	10	0.0342131
				E After 2nd staining	0.923818	10	0.389902	0.922067	10	0.37452
				L Difference bleaching1 - base line	0.924685	10	0.397689	0.95564	10	0.735247
				L Difference bleaching2 - base line	0.953303	10	0.70764	0.919971	10	0.356712
				L Difference bleaching2 - bleaching1	0.939363	10	0.54595	0.94107	10	0.564982
				Only one variable is slightly deviated from normality.
				Parametric tests will be applied
				Analysis of L
				General Linear Model
				Repeated measure mixed Design ANOVA
				One within subjects factor : Time
				One between subjects factors : Surfaces ( test & control)
				Descriptive Statistics
						Mean	SD	N
				L at stained baseline	Test surface	-0.87	2.51487	10
					Con trol surface	0.49	4.01205	10
				L After bleaching 1	Test surface	4.72	2.93666	10
					Con trol surface	5.61	2.54229	10
				L After bleaching 2	Test surface	6.51	2.49419	10
					Con trol surface	7.2	2.0521	10
					Test surface	Control surface
				L v staining (8 days)*	-0.87	0.49
				L vb1*	4.72	5.61
				L vb2*	6.51	7.2
				Mauchly's Test of Sphericity is significant indicating violation of sphericity assumption
				Greenhouse-Geisser correction will be applied
				Tests of Within-Subjects Effects
						Sum of Squares	df	Mean Square	F	P Value
				time	Greenhouse-Geisser	541.094	1.25876	429.863	106.117	9.41971e-11	P < 0.001 HS
				time * group	Greenhouse-Geisser	1.183	1.25876	0.939815	0.232005	0.689918	P > 0.05 NS
				Error	Greenhouse-Geisser	91.7827	22.6577	4.05085
				Time as a main effect is statistically highly significant
				Interaction of time and groups (Surfaces) is statistically non significant.
				Tests of Between-Subjects Effects
					Sum of Squares	df	Mean Square	F	P Value
				Intercept	932.993	1	932.993	49.4401	1.46311e-06	P < 0.001 HS
				group	14.406	1	14.406	0.763386	0.393779	P > 0.05 NS
				Error	339.681	18	18.8712
				Type of surface (groups) as a main effect is statistically non significant
				Estimated Marginal Means
				1. time
				Estimates
				Measure: L
				time	Mean	Std. Error	95% Confidence Interval
							Lower Bound	Upper Bound
				L at stained baseline	-0.19	0.748684	-1.76293	1.38293
				L After bleaching 1	5.165	0.61415	3.87472	6.45528
				L After bleaching 2	6.855	0.510689	5.78208	7.92792
				Multiple Comparison by Bonferroni method
				(I) time	(J) time	Mean Difference (I-J)	Std. Error	P Value	95% Confidence Interval for Difference
									Lower Bound	Upper Bound
				L at stained baseline	L After bleaching 1	-5.355	0.51209	1.34084e-08	-6.70648	-4.00352	P < 0.001 HS
				L at stained baseline	L After bleaching 2	-7.045	0.648556	7.39074e-09	-8.75663	-5.33337	P < 0.001 HS
				L After bleaching 2	L After bleaching 1	-1.69	0.286347	4.13557e-05	-2.44571	-0.93429	P < 0.001 HS
				2. group
				Estimates
				Measure: L
				group	Mean	Std. Error	95% Confidence Interval
							Lower Bound	Upper Bound
				Test surface	3.45333	0.79312	1.78705	5.11962
				Control surface	4.43333	0.79312	2.76705	6.09962
				Pairwise Comparison by Bonferroni method
						Mean Difference	Std. Error	P Value	95% Confidence Interval for Difference
									Lower Bound	Upper Bound
				Test surface	Control surface	-0.98	1.12164	0.393779	-3.33648	1.37648	P > 0.05 NS
				Independent samples t test for comparing the change
				in L between the two groups
												95% Confidence Interval of the Difference
						N	Mean	SD	SEM	Mean Difference	SED	Lower	Upper	t	df	P Value
				ΔLvb1*	Test surface	10	5.59	1.23058	0.389144	0.47	1.02418	-1.68172	2.62172	0.458904	18	0.651796	P > 0.05 NS
					Control surface	10	5.12	2.99585	0.947371
				ΔLvb2*	Test surface	10	7.38	1.62193	0.5129	0.67	1.29711	-2.05513	3.39513	0.516532	18	0.611771	P > 0.05 NS
					Control surface	10	6.71	3.76754	1.1914
				Δ ΔLvb*	Test surface	10	1.79	1.2931	0.408915	0.2	0.572693	-1.00318	1.40318	0.349227	18	0.730971	P > 0.05 NS
					Control surface	10	1.59	1.26794	0.400957
				Statistical Analysis of ΔE
					Test Surface			Control surface
					Shapiro-Wilk			Shapiro-Wilk
					Statistic	df	Sig.	Statistic	df	Sig.
				Delta E bleaching 1	0.912584	10	0.299219	0.917629	10	0.337606
				Delta E bleaching 2	0.84775	10	0.0546134	0.972696	10	0.914653
				Difference Delta E bleaching2-bleaching1	0.85576	10	0.0679933	0.97714	10	0.948048
				All variables are normally distributed
				Parametric tests will be applied
				Analysis of Delta E
				General Linear Model
				Repeated measure mixed Design ANOVA
				One within subjects factor : Time
				One between subjects factors : Surfaces ( test & control)
				Descriptive Statistics
						Mean	SD	N
				Delta E bleaching 1	Test surface	6.629	1.53136	10
					Con trol surface	4.579	2.0761	10
				Delta E bleaching 2	Test surface	8.739	1.34502	10
					Control surface	6.291	2.50768	10
					Test surface	Control surface
				ΔEb1	6.629	4.579
				ΔEb2	8.739	6.291
				Mauchly's Test of Sphericity is not applicable
				Tests of Within-Subjects Effects
						Sum of Squares	df	Mean Square	F	P Value
				time	Sphericity Assumed	36.5192	1	36.5192	45.2151	2.64739e-06	P < 0.001 HS
				time * group	Sphericity Assumed	0.39601	1	0.39601	0.490308	0.492742	P > 0.05 NS
				Error	Sphericity Assumed	14.5382	18	0.807677
				Time as a main effect is statistically highly significant
				Interaction of time and groups (Surfaces) is statistically non significant.
				Tests of Between-Subjects Effects
					Sum of Squares	df	Mean Square	F	P Value
				Intercept	1721.08	1	1721.08	262.011	3.58175e-12	P < 0.001 HS
				group	50.58	1	50.58	7.70012	0.0124899	P < 0.05 S
				Error	118.237	18	6.56873
				Type of surface (groups) as a main effect is statistically significant
				Estimated Marginal Means
				1. time
				Estimates
				Measure: Delta E
				time	Mean	Std. Error	95% Confidence Interval
							Lower Bound	Upper Bound
				Delta E bleaching 1	5.604	0.4079	4.74703	6.46097
				Delta E bleaching 2	7.515	0.449931	6.56973	8.46027
				Multiple Comparison by Bonferroni method
				(I) time	(J) time	Mean Difference (I-J)	Std. Error	P Value	95% Confidence Interval for Difference
									Lower Bound	Upper Bound
				Delta E bleaching 1	Delta E bleaching 2	-1.911	0.284197	2.64739e-06	-2.50807	-1.31393	P < 0.001 HS
				2. group
				Estimates
				Measure: Delta E
				group	Mean	Std. Error	95% Confidence Interval
							Lower Bound	Upper Bound
				Test surface	7.684	0.573094	6.47997	8.88803
				Control surface	5.435	0.573094	4.23097	6.63903
				Pairwise Comparison by Bonferroni method
						Mean Difference	Std. Error	P Value	95% Confidence Interval for Difference
									Lower Bound	Upper Bound
				Test surface	Control surface	2.249	0.810477	0.0124899	0.546251	3.95175	P < 0.05 S
				Independent samples t test for comparing the change
				in delta E between the two groups
												95% Confidence Interval of the Difference
						N	Mean	SD	SEM	Mean Difference	SED	Lower	Upper	t	df	P Value
				Delta E at bleaching 2 - Delta E at bleaching 2	Test surface	10	6.629	1.53136	0.48426	2.05	0.815799	0.336069	3.76393	2.51287	18	0.0217186	P < 0.05 S
					Control surface	10	4.579	2.0761	0.656522
