# Supplementary material for: Time-dependent effect of intense capsule-coffee and bleaching on the color of resin-infiltrated enamel white spot lesions: an in vitro study
Source: PeerJ. 2022 Oct 6;10:e14135. doi: 10.7717/peerj.14135 (PMC9548318; doi:10.7717/peerj.14135)
Supplement: Supplemental Information 3 [file peerj-10-14135-s003.xlsx]

## Sheet: Sheet1
CIELAB76 calc.data			ΔE changes over time with staining
group		1	2	3	4	5	6	7	8	9	10
ΔE After 1st staining	Test surface	9.81	10.72	7.91	7.34	10.92	8.81	10.02	10.69	8.4	11.16
	Control surface	2.8	6.81	2.45	5.31	3.26	7.26	6.25	8.06	1.71	6.39
ΔE After 2nd staining	Test surface	10.62	11.87	7.83	7.49	11.79	8.36	10.9	9.58	9.18	6.78
	Control surface	2.71	7.83	3.16	5.14	3.65	6.36	6.13	6.82	3.3	6
ΔE After 3rd staining	Test surface	10.4	12.69	9.69	8.17	12.51	8.25	11.03	9.02	9.01	11.79
	Control surface	3	9.85	3.36	6.11	4.43	5.05	5.47	8.12	2.44	6.51
ΔE After 4th staining	Test surface	11.14	12.06	9.41	8.98	12.73	10.43	11.23	11.33	9.97	11.29
	Control surface	3.26	11.81	3.89	5.36	6.04	4.76	6.16	7.42	3.74	6.5
	L change due to bleaching
group		1	2	3	4	5	6	7	8	9	10
L at stained baseline	Test surface	-0.7	-0.3	-3.8	-1.2	3.2	-1.6	-0.7	-3.3	-3.6	3.3
	Control surface	8.6	2	0.6	1.5	1.3	0.2	-7.7	1.2	-1.8	-1
L After bleaching1	Test surface	5.8	7	1.4	4.3	9	6.1	4.1	0.8	0.9	7.8
	Control surface	9.6	8.6	4.2	4.4	8	7.7	3.6	3.6	3	3.4
L After bleaching2	Test surface	5.9	8.9	3.3	7.5	8.4	8.7	5.1	3	4.4	9.9
	Control surface	8.5	9.7	6.6	7.4	9.3	9.4	7	5.7	4.1	4.3
		ΔE changes due to bleaching
group		1	2	3	4	5	6	7	8	9	10
ΔE bleaching 1	Test surface	8.58	7.74	5.65	4.48	8.15	6.96	5.03	5.09	6.25	8.36
	Control surface	2.79	8.51	3.91	4.94	6.87	6.37	2.32	2.53	4.28	3.27
ΔE bleaching 2	Test surface	8.53	9.82	7.82	7.6	7.51	10.58	7.54	8.45	8.29	11.25
	Control surface	2.61	11.02	5.6	6.97	8.27	8.73	5.9	4.97	5.12	3.72
